# Supplementary material
Source: Springer Nature journal article supplement (https://www.springermedizin.de/resource/supplementary/12943_2012_1042_MOESM6_ESM.pdf/9552168)

**A**

MDA-MB-231 (low endogenous rab31 expression)

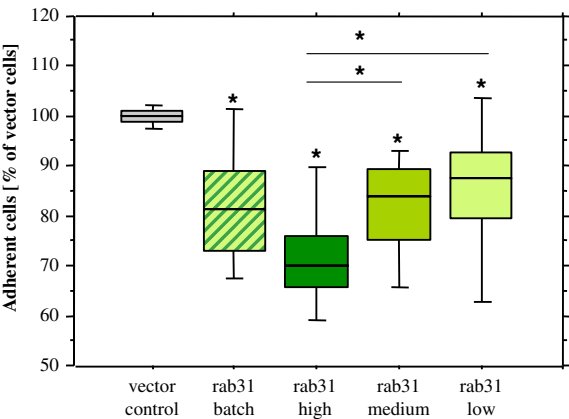**B**

CAMA-1 (no endogenous rab31 expression)

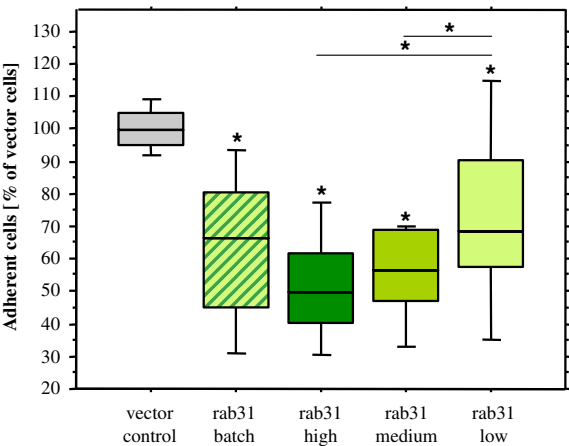

Supplement: MOESM6 [file 9552168]
